## Zika Virus Outbreak, Barbados, 2015 – 2016

Sadie J. Ryan<sup>1\*1,2,3</sup>, Catherine A. Lippi<sup>\*1,2</sup>, Colin J. Carlson<sup>4</sup>, Anna M. Stewart-Ibarra<sup>5</sup>, Mercy J. Borbor-Cordova<sup>6</sup>, Moory M. Romero<sup>5</sup>, Shelly-Ann Cox<sup>7</sup>, Roché Mahon<sup>7</sup>, Adrian Trotman<sup>7</sup>, Leslie Rollock<sup>8</sup>, Marquita Gittens-St. Hilaire<sup>9,10</sup>, Desmond King<sup>8</sup>, Steven Daniel<sup>8</sup>.

<sup>1</sup>Department of Geography, University of Florida, Gainesville, Florida, 32601, USA

<sup>2</sup>Emerging Pathogens Institute, University of Florida, Gainesville, Florida, 32610, USA

<sup>3</sup>School of Life Sciences, University of KwaZulu-Natal, Durban, South Africa

<sup>4</sup>Department of Environmental Science, Policy, and Management, University of California, Berkeley, Berkeley, California, 94720 USA

<sup>5</sup>Center for Global Health and Translational Science, State University of New York (SUNY) Upstate Medical University, Syracuse, NY 13210 USA

<sup>6</sup>Facultad de Ingeniería Marítima, Ciencias Oceánicas y Recursos Naturales (FIMCBOR) Escuela Superior Politécnica del Litoral (ESPOL), Guayaquil, 090150, Ecuador.

<sup>7</sup>Caribbean Institute for Meteorology and Hydrology (CIMH), P.O. Box 130, Bridgetown, Barbados

<sup>8</sup>Ministry of Health, Frank Walcott Building, Culloden Road, St. Michael, Barbados

<sup>9</sup>University of the West Indies at Cave Hill, Faculty of Medical Sciences, Bridgetown, St. Michael, Barbados

---

<sup>1</sup> \***Address for correspondence:** Sadie J. Ryan, Department of Geography, 3128 Turlington Hall, University of Florida, Gainesville, Florida, 32601, USA; email: [sjryan@ufl.edu](mailto:sjryan@ufl.edu); phone: (352) 294-7513

21 <sup>10</sup>Barbados Leptospira Laboratory, Ministry of Health, Lower Collymore Rock, St. Michael,

22 Barbados

23

24 **Keywords:** Zika virus, Barbados, PAHO

25

26 **Abstract:** Barbados is a Caribbean island country of approximately 285,000 people, with a  
27 thriving tourism industry. In 2015, Zika spread rapidly throughout the Americas, and its  
28 proliferation through the Caribbean islands followed suit. Barbados reported its first confirmed  
29 autochthonous Zika transmission to the Pan American Health Organization (PAHO) in January  
30 2016, a month before the global public health emergency was declared. Following detection of  
31 suspected Zika cases on Barbados in 2015, 926 individuals were described as suspected cases,  
32 and 147 lab confirmed cases were reported through December 2016, the end of the most recent  
33 epidemiological year. In this short report, we describe the epidemiological characteristics of 926  
34 clinical case records which were originally suspected as cases of Zika, and which were  
35 subsequently sent for testing and confirmation; 147 were found positive for Zika, using RT-PCR  
36 methods, another 276 tested negative, and the remaining 503 were either pending results or still  
37 in the suspected category. Women were represented at about twice the rate of men in case  
38 records where sex was reported (71.9%), and confirmed cases (78.2%), and 19 of the confirmed  
39 positive cases were children under the age of 10.

40 Zika virus (ZIKV), a Flavivirus transmitted primarily by *Aedes aegypti* and *Ae. albopictus*  
41 mosquitoes, was first reported outside of Africa and Asia in 2007. However, it was not until  
42 2015 that Zika rapidly spread from Brazil throughout the Americas. Initially regarded as a mild  
43 febrile illness, the emergence of associated health complications such as Zika congenital  
44 syndrome (ZCS), including microcephaly and other birth defects, and Zika-associated Guillain-  
45 Barré syndrome (GBS), has posed an unprecedented challenge to global health<sup>1,2</sup>. Echoing the  
46 rapid spread throughout mainland South America, Zika reached the Caribbean early in the  
47 pandemic. Autochthonous transmission in Martinique was first reported in epidemiological week  
48 (EW) 51 of 2015, the first case from Puerto Rico was reported in EW 52 of 2015<sup>3</sup>, and many  
49 other islands began reporting cases early in 2016<sup>4</sup>. However, case data from several countries has  
50 yet to be consolidated and described outside of reports by the Pan American Health Organization  
51 (PAHO).

52 Suspected clinical Zika virus disease cases in Barbados were defined using clinical  
53 guidelines provided by PAHO, which include a rash plus one or more of: fever  $\geq 38.5^{\circ}\text{C}$ ,  
54 conjunctivitis, arthralgia, myalgia, peri-articular edema<sup>5</sup>, but laboratory testing of suspected  
55 arboviral cases was also conducted during the Barbados Zika outbreak. Active surveillance of  
56 Zika cases (suspected and confirmed) among persons who visited health clinics started as early  
57 as May 2015, and the first laboratory confirmed autochthonous case of Zika was reported to  
58 PAHO in EW 1 of 2016. However, there were three cases from December, 2015, which were  
59 later lab confirmed, of which only one had travel history during the month of infection.  
60 Therefore asymptomatic cases may have existed prior to December 2015. Initial Zika case  
61 confirmation was conducted using CDC Trioplex RT-PCR assay at for DENV, CHIKV, and  
62 ZIKV, at the Caribbean Public Health Agency (CARPHA) laboratory in Trinidad and Tobago,

63 until RT-PCR using the CDC Trioplex assay was established in September 2016 at the  
64 *Leptospira* Laboratory, the national reference laboratory of the Ministry of Health of Barbados.  
65 Initial testing was biased towards women, particularly pregnant women, reflecting a targeted  
66 response. Once testing capability and capacity became local, all samples with suspected arboviral  
67 infection were tested for Zika, chikungunya, and dengue viruses. We collected data from records  
68 at the Ministry of Health, Barbados, on patients' age, sex, date of illness onset, occupation, and  
69 laboratory diagnostic status (suspected, negative, positive, pending testing). Our reported total  
70 suspected case records comprise clinically suspected Zika virus cases prior to September of  
71 2016, and all cases tested as suspected for any of the three arboviral infections, after local testing  
72 capacity was established.

73 The first confirmed Zika case in Barbados, a 42-year-old man, reported onset on  
74 December 26, 2015, during EW 51. New cases were subsequently recorded through December  
75 30, 2016 (Fig. 1), with the last cases in 2016 recorded in EW 52. In total, 926 cases with Zika  
76 status (suspected, negative, positive, pending testing) were recorded in Barbados in 2015 and  
77 2016, after the first confirmed Zika case, of which 147 (15.9%) were positively confirmed with  
78 RT-PCR, and 276 tested negative. The remaining cases were in suspected and pending status at  
79 the time of this analysis.

80 Sex was reported for 899 of the 926 overall cases in this study (97.1%). Women were  
81 disproportionately represented at over twice the frequency of men, with 646 women (71.9%) and  
82 253 men (28.1%). In the confirmed positive cases, this also bore out with 115 women (78.2%)  
83 and 32 men (21.8%) in the positively confirmed cases, consistent with a female bias found in  
84 other reports on Zika outbreaks<sup>6</sup>. Age was reported for 875 of 926 overall cases (94.5%), with a  
85 mean age of 33, and median age of 32; in the positively confirmed cases, mean age was 30, and

86 median of 31, a difference that was not significant. Of the 926 overall cases, 147 (17.0%) were  
87 children under the age of ten, and 573 (65.4%) were of childbearing age (15-49). Women of  
88 childbearing age represented 77 (52.3%) of the 147 confirmed positive cases, and made up a  
89 sizable proportion (48.6%) of the 875 overall cases for which age and sex were both reported.  
90 For the 147 positive cases in which age was reported, 19 were children under the age of ten. One  
91 of 116 unique occupations were reported for 283 records. We grouped these into five major  
92 categories: educational (53), service/hospitality (88), health sector (17),  
93 administrative/professional (93), and other (32). The most numerous unique occupational  
94 descriptions among these were students (39 plus 2 student nurses), teachers (13), nurses (10), and  
95 unemployed (15). The high number of unique occupational descriptions reported, and the low  
96 sample of recorded occupations precludes rigorous statistical inference of occupational hazards.  
97 The testing status for other arboviral infections for the 926 clinical cases examined for Zika are  
98 given in Table 1. It is important to note that dengue testing is conducted at the local Dengue  
99 Laboratory, in which a blood sample from suspected dengue cases is sent to the lab from the  
100 clinic, and NS1, IgM and IgG, if the sample is from the first 5 days of illness, and if NSI and  
101 IgM are negative within the first 3 days, another test is conducted for IgM and IgG after 5 days  
102 of illness<sup>7</sup>. In these suspected Zika case records, we cannot distinguish between the triplex  
103 results and blood test results as part of normal surveillance for Dengue. We therefore have far  
104 more information about dengue status than for chikungunya. Of the 926 cases in this study, 314  
105 were positive for dengue, and 3 for chikungunya, with an additional 75 suspected for  
106 chikungunya. Interestingly, there were 15 positively confirmed Zika-dengue coinfections, but  
107 none of the 3 reported confirmed chikungunya cases were coinfections. Other factors of interest

108 when reporting Zika, such as pregnancy status and access to medical care, were not included in  
109 the available data for this report.

110 *Aedes* mosquitoes are established throughout the Caribbean, with active transmission of  
111 dengue, chikungunya, and now Zika viruses documented on many islands. In the broader context  
112 of emerging arboviruses, the early and rapid onset of the Zika outbreak in Barbados relative to  
113 the larger pandemic in the Americas demonstrates that the existence of *Aedes* populations leave  
114 even small islands highly susceptible to the spread of novel pathogens. We saw a female bias in  
115 cases, particularly toward women of childbearing age, and what appeared to be two waves of  
116 cases in 2016 (Fig. 1). The rapid proliferation of Zika infections calls attention to the need to  
117 strengthen local capacities for targeted vector control, integrated strategies such as campaigns for  
118 cleaning reservoirs, particularly underground cisterns, and health education through formal and  
119 informal education programs. In addition this calls for global efforts to support the development  
120 of effective vaccines, and a better understanding of the role of sexual transmission and  
121 heightened risk to vulnerable populations such as pregnant women.

## 122 **Acknowledgements**

123 We thank the Caribbean Institute for Meteorology and Hydrology (CIMH), the people of  
124 Barbados, and particularly the Ministry of Health of Barbados. In response to the emerging  
125 burden of *Aedes aegypti* transmitted diseases in the Caribbean, the Caribbean Institute for  
126 Meteorology and Hydrology (CIMH) has partnered with an international team of researchers to  
127 investigate the eco-epidemiology and climate drivers of dengue fever, chikungunya, and Zika  
128 fever. This was done through the United States Agency for International Development's  
129 (USAID) Programme for Building Regional Climate Capacity in the Caribbean (BRCCC  
130 Programme), executed by the World Meteorological Organization (WMO), and implemented by  
131 CIMH. This initiative has brought together the national and regional health and climate sectors  
132 (Barbados Ministry of Health, Barbados Meteorological Services, Caribbean Public Health  
133 Agency (CARPHA), PAHO and CIMH) to co-develop climate services for the health sector,  
134 with a focus on climate-driven spatio-temporal models to predict disease outbreaks.

135

## 136 **Funding**

137 This study was solicited by the Caribbean Institute for Meteorology and Hydrology (CIMH)  
138 through the United States Agency for International Development's (USAID) Programme for  
139 Building Regional Climate Capacity in the Caribbean (BRCCC Programme) with funding made  
140 possible by the generous support of the American people.

141

## 142 **Author Contact Information**

143 Sadie J. Ryan and Catherine A. Lippi, Department of Geography and Emerging Pathogens  
144 Institute, University of FL, Gainesville, FL, Email: [sjryan@ufl.edu](mailto:sjryan@ufl.edu) and [clippi@ufl.edu](mailto:clippi@ufl.edu). Colin J.



145 Carlson, Department of Environmental Science, Policy, and Management, University of  
146 California, Berkeley, Berkeley, CA, Email: [cjcarlson@berkeley.edu](mailto:cjcarlson@berkeley.edu). Anna M. Stewart-Ibarra  
147 and Moory M. Romero, Center for Global Health and Translational Science, State University of  
148 New York (SUNY) Upstate Medical University, Syracuse, NY, Email: [stewart@upstate.edu](mailto:stewart@upstate.edu)  
149 and [romero.moory@gmail.com](mailto:romero.moory@gmail.com). Mercy J. Borbor-Cordova, Facultad de Ingeniería Marítima,  
150 Ciencias Oceánicas y Recursos Naturales (FIMCBOR), Escuela Superior Politécnica del Litoral  
151 (ESPOL), Guayaquil, Ecuador, Email: [meborbor@espol.edu.ec](mailto:meborbor@espol.edu.ec). Shelly-Ann Cox, Roché Mahon,  
152 and Adrian Trotman, Caribbean Institute for Meteorology and Hydrology (CIMH), Bridgetown,  
153 Barbados, Email: [scox@cimh.edu.bb](mailto:scox@cimh.edu.bb), [rmahon@cimh.edu.bb](mailto:rmahon@cimh.edu.bb), and [atrotman@cimh.edu.bb](mailto:atrotman@cimh.edu.bb). Leslie  
154 Rollock, Desmond King, and Steven Daniel, Ministry of Health, Frank Walcott Building, St.  
155 Michael, Barbados, Email: [leslie.rollock@health.gov.bb](mailto:leslie.rollock@health.gov.bb), [desmond.king@health.gov.bb](mailto:desmond.king@health.gov.bb), and  
156 [steve.daniel@health.gov.bb](mailto:steve.daniel@health.gov.bb). Marquita Gittens-St. Hilaire, University of the West Indies at Cave  
157 Hill, Faculty of Medical Sciences, Bridgetown, St. Michael, Barbados, Email:  
158 [marquita.gittens@cavehill.uwi.edu](mailto:marquita.gittens@cavehill.uwi.edu).  
159

160 **References**

- 161 1. Brasil P, Pereira Jr JP, Moreira ME, Ribeiro Nogueira RM, Damasceno L, Wakimoto M,  
162 Rabello RS, Valderramos SG, Halai U-A, Salles TS, others. Zika virus infection in pregnant  
163 women in Rio de Janeiro. *N Engl J Med*. 2016;375(24):2321–2334.
- 164 2. Rodrigues LC. Microcephaly and Zika virus infection. *The Lancet*. 2016;387(10033):2070–  
165 2072.
- 166 3. Pan-American Health Organization / World Health Organization. *Zika-Epidemiological*  
167 *Report Puerto Rico*. Washington, D.C.: PAHO/WHO; 2017.
- 168 4. Ryan SJ, Carlson CJ, Stewart-Ibarra AM, Borbor-Cordova MJ, Romero MM, Cox S-A,  
169 Mahon R, Trotman A, St. Ville S, Ahmed S. Outbreak of Zika Virus Infections, Dominica,  
170 2016. *Emerg Infect Dis*. 2017;23(11):1926-1927. doi:10.3201/eid2311.171140.
- 171 5. Pan American Health Organization. Zika Resources: Case Definitions. PAHO WHO|Zika  
172 Resources: Case Definitions.  
173 [http://www.paho.org/hq/index.php?option=com\\_content&view=article&id=11117%3Azika-](http://www.paho.org/hq/index.php?option=com_content&view=article&id=11117%3Azika-resources-case-definitions-&catid=8424%3Acontents&Itemid=41532&lang=en)  
174 [resources-case-definitions-&catid=8424%3Acontents&Itemid=41532&lang=en](http://www.paho.org/hq/index.php?option=com_content&view=article&id=11117%3Azika-resources-case-definitions-&catid=8424%3Acontents&Itemid=41532&lang=en). Published  
175 April 1, 2016. Accessed February 14, 2018.
- 176 6. Pacheco O, Beltrán M, Nelson CA, Valencia D, Tolosa N, Farr SL, Padilla AV, Tong VT,  
177 Cuevas EL, Espinosa-Bode A, others. Zika virus disease in Colombia—preliminary report. *N*  
178 *Engl J Med*. 2016.
- 179 7. Kumar A, Gittens-St Hilaire M, Clarke-Greenidge N, Nielsen A. Epidemiological Trend and  
180 Clinical Observations among Children and Adults with Dengue in Barbados. *West Indian*  
181 *Med J*. 2015;64(1):37-42. doi:10.7727/wimj.2015.110.

182

183

184 **Figure 1:** Zika cases (suspected in grey, confirmed in black) reported on Barbados (2015 –  
185 2016).

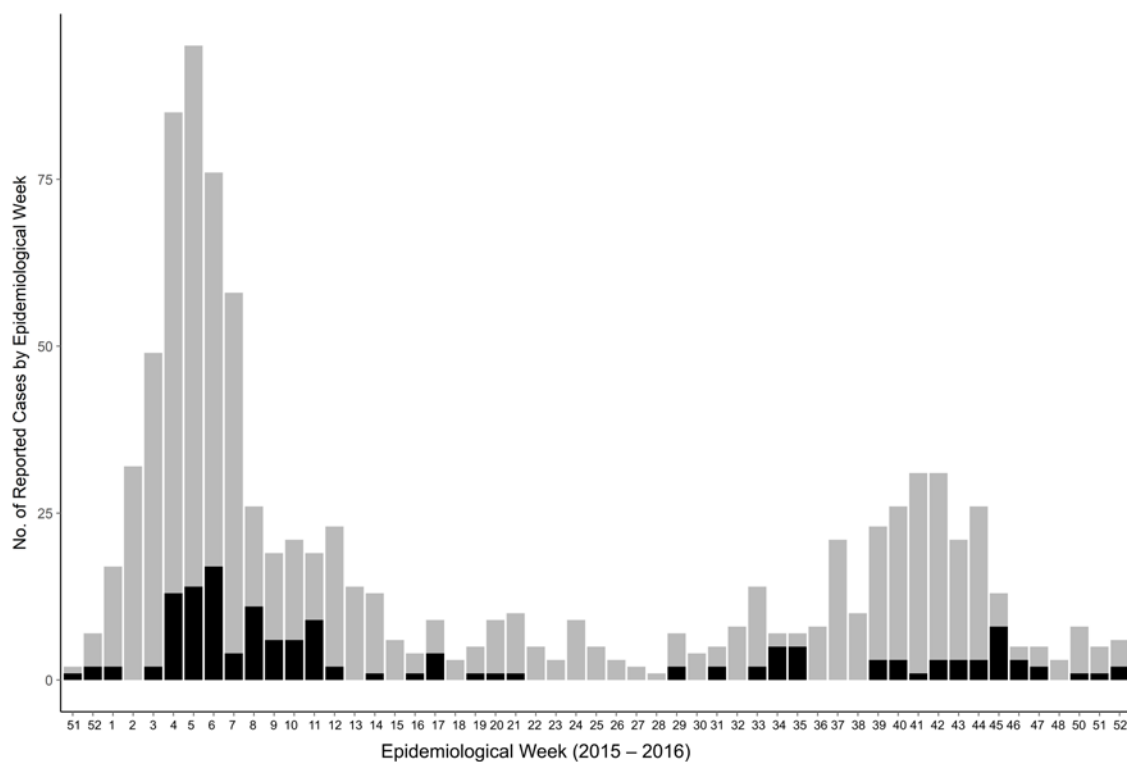

186

187

188 **Table 1:** Summary of arboviral infection status (Dengue, Zika, Chikungunya) reported in the  
189 926 total case records.

|                       | Dengue           | Zika     | Chikungunya            |
|-----------------------|------------------|----------|------------------------|
| Positive              | 314 <sup>1</sup> | 147      | 3                      |
| Negative              | 601              | 276      | 477                    |
| Suspected             | 0                | 454      | 75                     |
| Pending               | 0                | 49       | 0                      |
| <i>Missing Status</i> | <i>11</i>        | <i>0</i> | <i>371<sup>2</sup></i> |

190 <sup>1</sup>Dengue status includes blood test results; there were 15 Dengue/Zika coinfecting cases.
